# Supplementary material for: Development and validation of a new tool to measure the facilitators, barriers and preferences to exercise in people with osteoporosis
Source: Springer Nature journal article supplement (doi:10.1186/s12891-017-1914-5), 2017-12-01
Supplement: MOESM3 [file 15319664]

ID: \_\_\_\_\_

# Personalized Exercise Questionnaire (PEQ)

## PLEASE READ THESE INSTRUCTIONS BEFORE STARTING:

This survey was created to better understand your **exercise needs** and **goals**. By completing this survey you will help us understand some of the difficulties you face in an exercise program. This information will be used to help us create better exercise/ physical activity program for you.

There are **6 sections** and **38 questions**. Please complete **ALL** questions relevant to you. **All answers will be kept strictly confidential and never associated with your name**

### SECTION ONE: My Support Network

|                                                                                                                                | No                       | Not<br>Sure              | Yes                      | Not<br>Applicable        |
|--------------------------------------------------------------------------------------------------------------------------------|--------------------------|--------------------------|--------------------------|--------------------------|
| 1. I prefer someone to supervise/<br>assist me with an exercise:                                                               | <input type="checkbox"/> | <input type="checkbox"/> | <input type="checkbox"/> | <input type="checkbox"/> |
| If <b>YES</b> , under a:                                                                                                       |                          |                          |                          |                          |
| <input type="checkbox"/> Healthcare professional (e.g.<br>physiotherapist)                                                     |                          |                          |                          |                          |
| <input type="checkbox"/> Personal Trainer                                                                                      |                          |                          |                          |                          |
| <input type="checkbox"/> Other: _____                                                                                          |                          |                          |                          |                          |
| 2. A healthcare provider (e.g.<br>physiotherapist, nurse, etc.) with a good<br>attitude toward exercise is<br>important to me: | <input type="checkbox"/> | <input type="checkbox"/> | <input type="checkbox"/> | <input type="checkbox"/> |
| 3. Having friends/family with a<br>good attitude toward exercise is<br>important to me:                                        | <input type="checkbox"/> | <input type="checkbox"/> | <input type="checkbox"/> | <input type="checkbox"/> |

ID: \_\_\_\_\_

## SECTION TWO: My Access to Exercise

|                                                                                                                | No                       | Not<br>Sure              | Yes                      | Not<br>Applicable        |
|----------------------------------------------------------------------------------------------------------------|--------------------------|--------------------------|--------------------------|--------------------------|
| 4. I have a place to exercise (indoor or outdoor) at home, place of work or near my home/work place:           | <input type="checkbox"/> | <input type="checkbox"/> | <input type="checkbox"/> | <input type="checkbox"/> |
| If <b>YES</b> , how far:                                                                                       |                          |                          |                          |                          |
| <input type="checkbox"/> At home or at work                                                                    |                          |                          |                          |                          |
| <input type="checkbox"/> < 5 km (< 3 miles)                                                                    |                          |                          |                          |                          |
| <input type="checkbox"/> 5 – 10 km (3-6 miles)                                                                 |                          |                          |                          |                          |
| 5. I am able to get to an exercise site on my own: (Check “Not Applicable” if you exercise at home)            | <input type="checkbox"/> | <input type="checkbox"/> | <input type="checkbox"/> | <input type="checkbox"/> |
| If <b>NO</b> , who could you ask:                                                                              |                          |                          |                          |                          |
| <input type="checkbox"/> Family member/partner                                                                 |                          |                          |                          |                          |
| <input type="checkbox"/> Friend                                                                                |                          |                          |                          |                          |
| <input type="checkbox"/> Other: _____                                                                          |                          |                          |                          |                          |
| 6. I have transportation to an exercise site: (Check “Not Applicable” if you exercise at home)                 | <input type="checkbox"/> | <input type="checkbox"/> | <input type="checkbox"/> | <input type="checkbox"/> |
| If <b>YES</b> , type of transportation:                                                                        |                          |                          |                          |                          |
| <input type="checkbox"/> Bike                                                                                  |                          |                          |                          |                          |
| <input type="checkbox"/> Motor Vehicle (e.g. car)                                                              |                          |                          |                          |                          |
| <input type="checkbox"/> Public transportation                                                                 |                          |                          |                          |                          |
| <input type="checkbox"/> Walking                                                                               |                          |                          |                          |                          |
| 7. I have a safe place to exercise: (e.g. proper space to exercise, dry and clean floors, good lighting, etc.) | <input type="checkbox"/> | <input type="checkbox"/> | <input type="checkbox"/> | <input type="checkbox"/> |
| 8. I have an encouraging place to exercise: (e.g. pleasant people that motivate me)                            | <input type="checkbox"/> | <input type="checkbox"/> | <input type="checkbox"/> | <input type="checkbox"/> |

ID: \_\_\_\_\_

|                                                                                                    | No                       | Not<br>Sure              | Yes                      | Not<br>Applicable        |
|----------------------------------------------------------------------------------------------------|--------------------------|--------------------------|--------------------------|--------------------------|
| 9. I have an exercise location that is free of cost or reasonably priced (including parking fees): | <input type="checkbox"/> | <input type="checkbox"/> | <input type="checkbox"/> | <input type="checkbox"/> |

### SECTION THREE: My Exercise Goals

How important are the following GOALS to YOU in an exercise program?

|                              | Not<br>Important         | Somewhat<br>Important    | Very<br>Important        | Not<br>Applicable        |
|------------------------------|--------------------------|--------------------------|--------------------------|--------------------------|
| 10. Feel less tired          | <input type="checkbox"/> | <input type="checkbox"/> | <input type="checkbox"/> | <input type="checkbox"/> |
| 11. Be able to walk longer   | <input type="checkbox"/> | <input type="checkbox"/> | <input type="checkbox"/> | <input type="checkbox"/> |
| 12. Be more flexible         | <input type="checkbox"/> | <input type="checkbox"/> | <input type="checkbox"/> | <input type="checkbox"/> |
| 13. Have better balance      | <input type="checkbox"/> | <input type="checkbox"/> | <input type="checkbox"/> | <input type="checkbox"/> |
| 14. Fall less often          | <input type="checkbox"/> | <input type="checkbox"/> | <input type="checkbox"/> | <input type="checkbox"/> |
| 15. Have less pain           | <input type="checkbox"/> | <input type="checkbox"/> | <input type="checkbox"/> | <input type="checkbox"/> |
| 16. Increase muscle strength | <input type="checkbox"/> | <input type="checkbox"/> | <input type="checkbox"/> | <input type="checkbox"/> |

17. What is your MOST important exercise goal?

-----

### SECTION FOUR: My Exercise Preferences

18. Please list up to 3 things that HELP you to exercise more often:

1. \_\_\_\_\_
2. \_\_\_\_\_
3. \_\_\_\_\_

ID: \_\_\_\_\_

19. Where would you like your exercise program to be? (Check **ALL** that apply)

- ☐ Home
- ☐ Gym (e.g. YMCA/YWCA, Goodlife Fitness, Wynn Fitness, etc.)
- ☐ Mall
- ☐ Community Centre
- ☐ Outdoors (e.g. parks, trails, sidewalks, etc.)
- ☐ Other: \_\_\_\_\_

20. What is the best time for you to exercise? (Check **ALL** that apply)

- ☐ Morning (between 6:00 am to 12:00 pm)
- ☐ Afternoon (between 12:00 pm to 6:00 pm)
- ☐ Evening (between 6:00 pm to 11:00 pm)

21. What is your preferred exercise schedule? (Check **ALL** that apply)

- ☐ Fixed time (same class offered at same time during the week)
- ☐ Multiple drop-in times (same class offered at different times of the week)
- ☐ On my own time

22. What is your preferred exercise class size? (Check **ALL** that apply)

- ☐ I prefer to exercise alone
- ☐ With a partner/trainer
- ☐ Small group (less than 10 people)
- ☐ Large group (more than 10 people)
- ☐ Does not matter

23. How would you like to learn proper exercise technique? (Check **ALL** that apply)

- ☐ Taught by a healthcare professional (e.g. physiotherapist, nurse, etc.)
- ☐ Taught by a trainer/health club staff
- ☐ Learn on my own from an exercise video
- ☐ Learn on my own from a website with pictures
- ☐ Learn on my own using an app
- ☐ Learn on my own using a print handout
- ☐ Have a friend teach me
- ☐ Have another person with osteoporosis teach me
- ☐ None of the above

ID: \_\_\_\_\_

24. What level of exercise are you comfortable doing? (Check **ALL** that apply)

- ☐ Easy to perform
- ☐ Challenging to perform (i.e. "I like a challenge")
- ☐ Slow paced exercises
- ☐ Fast paced exercises
- ☐ Easy to remember

## SECTION FIVE: My Feedback and Tracking

25. I would like to receive feedback about my progress:

- ☐ YES
- ☐ NO

If **YES**, by: (Check **ALL** that apply)

- ☐ Email
- ☐ In person
- ☐ Social media (e.g. Twitter, Facebook, etc.)
- ☐ Phone call
- ☐ Text message

*If you answered **YES** to question 25, please complete questions 26 and 27.*

*If you answered **NO** to question 25, please skip to question 28.*

26. What type of feedback would you like to receive? (Check **ALL** that apply)

- ☐ Regarding my exercise progress and future improvements
- ☐ Regarding proper exercise techniques
- ☐ Other: \_\_\_\_\_

27. How often would you like to receive feedback about your exercise progress? (Please check only **ONE** answer)

- ☐ Daily
- ☐ Weekly
- ☐ Monthly
- ☐ Yearly

ID: \_\_\_\_\_

28. I would like to give feedback on the exercise program:

- ☐ YES
- ☐ NO

If **YES**, by (Check **ALL** that apply):

- ☐ Email
- ☐ In person
- ☐ Social media (e.g. Twitter, Facebook, etc.)
- ☐ Phone call
- ☐ Text message

29. I would like to track my exercise progress:

- ☐ YES
- ☐ NO

If **YES**, using (Check **ALL** that apply):

- ☐ Cellphone/mobile
- ☐ Diary/Log book
- ☐ Wearable technology (e.g. Fit Bit, pedometer, watch etc.)
- ☐ Other: \_\_\_\_\_

## SECTION SIX: My Barriers to Exercise

30. Do you have things that STOP you from exercising?

- ☐ Yes
- ☐ No

If **YES**, how often does it stop you from exercising: (Check only **ONE** answer)

- ☐ Always
- ☐ Very often
- ☐ Sometimes
- ☐ Rarely

31. Please list up to 3 things that STOP you from exercising more often:

1. \_\_\_\_\_
2. \_\_\_\_\_
3. \_\_\_\_\_

ID: \_\_\_\_\_

32. I do not exercise as often as I like because: (Check **ALL** that apply)

- ☐ I do not like exercise
- ☐ I do not want to fall
- ☐ I do not want to injure myself (e.g. breaking a bone or bruising)
- ☐ I feel pain when I exercise
- ☐ I feel bored when exercising
- ☐ Other: \_\_\_\_\_
- ☐ None of the above

33. I do not exercise as often as I like because I have difficulty: (Check **ALL** that apply)

- ☐ Understanding the exercise
- ☐ Performing the exercise (i.e. I do not know how to exercise safely)
- ☐ Other: \_\_\_\_\_
- ☐ None of the above

34. I do not exercise as often as I like because I do not have: (Check **ALL** that apply)

- ☐ A place to exercise
- ☐ Confidence (e.g. I feel self-conscious about my body)
- ☐ Finances
- ☐ Mobility (e.g. limited movements due to pain)
- ☐ Proper quality of sleep
- ☐ Transportation
- ☐ Time (e.g. family priorities, work, etc.)
- ☐ Willpower/motivation
- ☐ Other: \_\_\_\_\_
- ☐ None of the above

35. Do weather conditions stop you from exercising as often as you like? (Check only **ONE** answer)

- ☐ Always
- ☐ Very often
- ☐ Sometimes
- ☐ Rarely
- ☐ Never

ID: \_\_\_\_\_

36. I do not exercise as often as I like because I have medical conditions such as: (Check **ALL** that apply)

- ☐ Arthritis (e.g. hips, knees, etc.)
- ☐ Cognitive concerns (e.g. Alzheimer, Dementia, Parkinson, etc.)
- ☐ Heart condition (e.g. angina, heart failure, etc.)
- ☐ Kidney disease (e.g. dialysis)
- ☐ Lung disease (e.g. asthma, COPD, etc.)
- ☐ Mental health issues (e.g. anxiety, depression, etc.)
- ☐ Other: \_\_\_\_\_
- ☐ None of the above

37. If you had fewer barriers would you spend more time exercising? (Please check only **ONE** answer)

- ☐ Yes
- ☐ No
- ☐ Not sure

38. Please check any mobility aids that you normally use:

- ☐ Cane
- ☐ Walker
- ☐ Crutches
- ☐ Wheelchair
- ☐ Other: \_\_\_\_\_
- ☐ None

😊 End 😊
